# Supplementary material for: Agarose-Degrading Characteristics of a Deep-Sea Bacterium Vibrio Natriegens WPAGA4 and Its Cold-Adapted GH50 Agarase Aga3420
Source: MDPI journal article supplement (doi:10.3390/md20110692), 2022-11-01
Supplement: s1 [file s1]

Table S1. Comparison of the properties of rAga3420 and other GH50 agarases

| Family | Bacterium                                   | Isolation sites   | Protein name | Optimal temperature (°C) | Optimal pH | Cold-adapted property | Reference  |
|--------|---------------------------------------------|-------------------|--------------|--------------------------|------------|-----------------------|------------|
| GH50   | <i>V.natriegens</i> WPAGA4                  | Deep-sea sediment | Aga3420      | 40                       | 7.0        | 0°C; >40%             | This study |
| GH50   | <i>Agarivorans albus</i> YKW-34             | Turban shell      | AgaA34       | 40                       | 8.0        | 10°C; >20%            | 1          |
| GH50   | <i>A. gilvus</i> WH0801                     | Seaweed           | AgWH50A      | 30                       | 6.0        | 20°C; >20%            | 2          |
| GH50   | <i>A. gilvus</i> WH0801                     | Seaweed           | AgWH50C      | 30                       | 6.0        | 20°C; >10%            | 3          |
| GH50   | <i>A. sp.</i> JAMB-A11                      | Sediment          | AgaA11       | 40                       | 7.5-8.0    | 20°C; 20%             | 4          |
| GH50   | <i>Paenibacillus agarexedens</i> BCRC 16000 | Soil              | AgaB-4       | 55                       | 6.0        | 20°C; >40%            | 5          |
| GH50   | <i>Pseudoalteromonas</i> sp. NJ21           | Sediment          | Aga21        | 30                       | 8.0        | 10°C; >85%            | 6          |
| GH50   | <i>Saccharophagus degradans</i> 2-40        | Marine bacterium  | Aga50D       | 30                       | 7.0        | 20°C; >80%            | 7          |
| GH50   | <i>Streptomyces coelicolor</i> A3(2)        | Soil              | DagB         | 40                       | 7.0        | 20°C; 20%             | 8          |
| GH50   | <i>Victivallis vadensis</i> ATCC BAA-548    | Human fecal       | VadG925      | 40, 60                   | 7.0        | 4°C; >20%             | 9          |

N.D. not determined

Table S2. The values of ANI and DDH of *Vibrio natriegens* WPAGA4 with other *Vibrio* species.

| Bacterium                        | ANI   | dDDH |
|----------------------------------|-------|------|
| <i>V. natriegens</i> NBRC 15636  | 98.23 | 84.6 |
| <i>V. chemaguriensis</i> Iso1    | 80.74 | 23.4 |
| <i>V. hyugaensis</i> 090810a     | 80.56 | 22.3 |
| <i>V. diabolicus</i> CNCM I-1629 | 79.65 | 23.4 |
| <i>V. inhibens</i> CECT 7692     | 79.51 | 22.6 |
| <i>V. communis</i> LMG 25430     | 79.00 | 22.7 |
| <i>V. jasicida</i> CAIM 1864     | 76.97 | 22.6 |
| <i>V. campbellii</i> CAIM 519    | 76.67 | 22.8 |
| <i>V. nereis</i> NBRC 15637      | 74.44 | 22.4 |

Table S3. The dbCAN annotation result of the 4 putative agarase genes

| Gene ID | EC#      | GH family | Amino acid location of the domain |
|---------|----------|-----------|-----------------------------------|
| aga3418 | 3.2.1.81 | GH50      | 281-963                           |
| aga3419 | 3.2.1.81 | GH50      | 251-919                           |
| aga3420 | 3.2.1.81 | GH50      | 270-948                           |
| aga3421 | 3.2.1.81 | GH50      | 69-739                            |

Table S4. The primer pairs for the putative agarase gene amplification

| Gene ID | Forward primer (5'-3')      | Reverse primer (5'-3')     |
|---------|-----------------------------|----------------------------|
| aga3418 | GCTACAAAAACACCAGACACATCC    | TTTGTTAATAGATCCGAATCGTCG   |
| aga3419 | TCAACGTTAGTGACTTCTTTTGAAAG  | TGATACGTATTTTCTACGTACCCATC |
| aga3420 | TGTC AATCGACGACAGGATC       | TTTAAAGCGGTTGTTATAGAGGTTTG |
| aga3421 | ACACCAACTATAAATGATGTGGT TAG | CTTATAACGCCGTTTATACATACAGC |

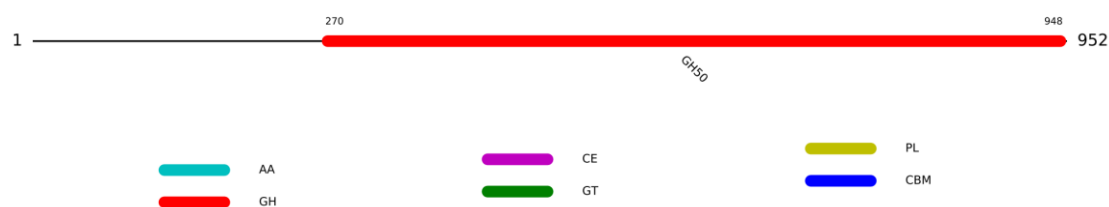

Fig. S1. The dbCAN annotation result of aga3420

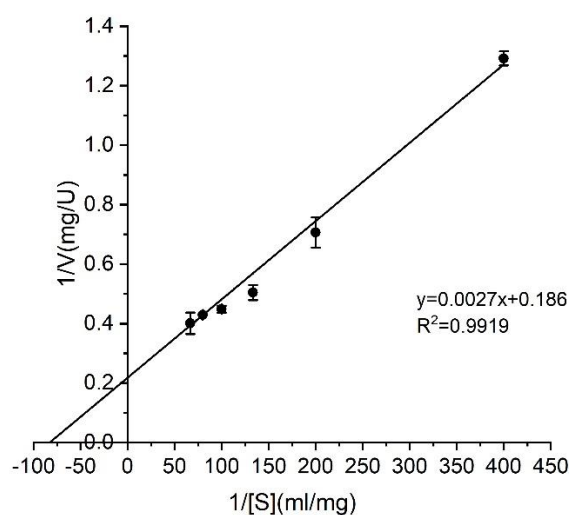

Fig. S2. Lineweaver-Burk plot of the kinetic parameter determination of rAga3420

## References

1. Fu, X.; Lin, H.; Kim, S.M. Purification and characterization of a novel beta-agarase, AgaA34, from *Agarivorans albus* YKW-34. *Appl Microbiol Biotechnol.* **2008**, 78, 2, 265-73.

2. Liu, N.; Mao, X.; Du, Z.; Mu, B.; Wei, D. Cloning and characterisation of a novel neoagarotetraose-forming- $\beta$ -agarase, AgWH50A from *Agarivorans gilvus* WH0801. *Carbohydr Res.* **2014**, 388, 147-51.
3. Liu, N.; Mao, X.; Yang, M.; Mu, B.; Wei, D. Gene cloning, expression and characterisation of a new  $\beta$ -agarase, AgWH50C, producing neoagarobiose from *Agarivorans gilvus* WH0801. *World J Microbiol Biotechnol.* **2014**, 30, 6, 1691-8.
4. Ohta, Y.; Hatada, Y.; Ito, S.; Horikoshi, K. High-level expression of a neoagarobiose-producing beta-agarase gene from *Agarivorans* sp. JAMB-A11 in *Bacillus subtilis* and enzymic properties of the recombinant enzyme. *Biotechnol Appl Biochem.* **2005**, 41, Pt 2:183-91.
5. Chen, Z.W.; Lin, H.J.; Huang, W.C.; Hsuan, S.L.; Lin, J.H.; Wang, J.P. Molecular cloning, expression, and functional characterization of the  $\beta$ -agarase AgaB-4 from *Paenibacillus agarexodens*. *AMB Express.* **2018**, 8, 1, 49.
6. Li, J.; Hu, Q.; Li, Y.; Xu, Y. Purification and characterization of cold-adapted beta-agarase from an Antarctic psychrophilic strain. *Braz J Microbiol.* **2015**, 46, 3, 683-90.
7. Kim, H.T.; Lee, S.; Lee, D.; Kim, H.S.; Bang, W.G.; Kim, K.H.; Choi, I.G. Overexpression and molecular characterization of Aga50D from *Saccharophagus degradans* 2-40: an exo-type beta-agarase producing neoagarobiose. *Appl Microbiol Biotechnol.* **2010**, 86, 1, 227-34.
8. Temuujin, U.; Chi, W.J.; Chang, Y.K.; Hong, S.K. Identification and biochemical characterization of Sco3487 from *Streptomyces coelicolor* A3(2), an exo- and endo-type  $\beta$ -agarase-producing neoagarobiose. *J Bacteriol.* **2012**, 194, 1, 142-9.
9. Temuujin, U.; Chi, W.J.; Park, J.S.; Chang, Y.K.; Song, J.Y.; Hong, S.K. Identification and characterization of a novel  $\beta$ -galactosidase from *Victivallis vadensis* ATCC BAA-548, an anaerobic fecal bacterium. *J Microbiol.* **2012**, 50, 6, 1034-40.
